# Supplementary material for: The ssDNA-binding protein MEIOB acts as a dosage-sensitive regulator of meiotic recombination
Source: PubMed Central journal article supplement — Nucleic Acids Res. 2020 Nov 9;48(21):12219–33. doi: 10.1093/nar/gkaa1016 (PMC7708077; doi:10.1093/nar/gkaa1016), 2020-11-09
Supplement: gkaa1016_supplemental_file.pdf [file gkaa1016_supplemental_file.pdf]

## Supplementary data

### **The ssDNA-binding protein MEIOB acts as a dosage-sensitive regulator of meiotic recombination**

Rui Guo, Yang Xu, N Adrian Leu, Lei Zhang, Serge Y Fuchs, Lan Ye, & P Jeremy Wang

#### **Summary:**

2 supplementary tables

10 supplementary figures

**Supplementary Table S1. Primary antibodies used in this study**

| Antibody      | Host              | Producer                  | Cat. No/reference | Dilution |       |
|---------------|-------------------|---------------------------|-------------------|----------|-------|
|               |                   |                           |                   | WB       | IF    |
| RPA2          | Rabbit            | Custom-made               | (Ref. 7)          | 1:250    | 1:50  |
| MEIOB         | Rabbit/guinea pig | Custom-made               | (Ref. 17)         | 1:2000   | 1:50  |
| SPATA22       | Rabbit            | ProteinTech Group         | 16989-1-AP        | 1:200    | 1:50  |
| TEX11         | Rabbit            | Custom-made               | (Ref. 26)         |          | 1:50  |
| $\gamma$ H2AX | Mouse             | Millipore                 | 05-636            | 1:2000   | 1:500 |
| SYCP1         | Rabbit            | Abcam                     | Ab15090           |          | 1:100 |
| SYCP3         | Mouse             | Abcam                     | Ab97672           | 1:3000   | 1:200 |
| SYCP3         | Rabbit            | ProteinTech Group         | 23024-1-AP        |          | 1:200 |
| MLH1          | Mouse             | BD Biosciences            | 50838             |          | 1:25  |
| HEI10         | Rabbit            | Abcam                     | Ab171035          |          | 1:25  |
| H3S10ph       | Rabbit            | Cell Signaling Technology | 9701S             |          | 1:200 |
| MYC           | Mouse             | Clontech                  | 631206            | 1:2000   |       |
| GFP           | Rabbit            | Abcam                     | Ab290             | 1:2000   |       |
| FLAG          | Mouse             | Sigma                     | F1804             | 1:5000   |       |
| ACTB          | Mouse             | Sigma                     | A5441             | 1:5000   |       |
| V5            | Mouse             | Invitrogen                | R960-25           | 1:2000   |       |
| c-JUN         | Rabbit            | Cell Signaling Technology | 9165T             | 1:1000   |       |
| LC3A/B        | Rabbit            | Cell Signaling Technology | 12741T            | 1:1000   |       |

## Supplementary Table S2. Mating test results of adult males and females

### A. Mating test result of adult males\*

| Genotype (Males)                  | Age (wk) | Length of mating (month) | No. of males | No. of litters/male (mean ± sd) | Fertility   | Litter size (mean ± sd) |
|-----------------------------------|----------|--------------------------|--------------|---------------------------------|-------------|-------------------------|
| <i>Meiob</i> <sup>N64I/+</sup>    | 7        | 3                        | 4            | 3.50 ± 0.58                     | 100% (4/4)  | 8.18 ± 1.51             |
| <i>Meiob</i> <sup>N64I/N64I</sup> | 7        | 3                        | 4            | 3.25 ± 0.50                     | 100% (4/4)  | 8.32 ± 1.67             |
| <i>Meiob</i> <sup>N64I/ΔS67</sup> | 7        | 3                        | 5            | 2.0 ± 0.0                       | 60% (3/5)** | 8.83 ± 2.25             |
| <i>Meiob</i> <sup>ΔS67/ΔS67</sup> | 7        | 3                        | 4            | 0                               | 0% (0/4)    | 0                       |

\* Each male was housed with one wild type female for three months.

\*\* Two males did not sire offspring.

### B. Mating test result of adult females†

| Genotype (females)                | Age (wk) | Length of mating (month) | No. of females | No. of litters/female (mean ± sd) | Fertility | Litter size (mean ± sd) |
|-----------------------------------|----------|--------------------------|----------------|-----------------------------------|-----------|-------------------------|
| <i>Meiob</i> <sup>N64I/+</sup>    | 8        | 3                        | 3              | 3.67 ± 0.58                       | 100%      | 7.89 ± 1.76             |
| <i>Meiob</i> <sup>N64I/N64I</sup> | 8        | 3                        | 3              | 3.33 ± 0.58                       | 100%      | 8.20 ± 1.65             |
| <i>Meiob</i> <sup>N64I/ΔS67</sup> | 8        | 3                        | 3              | 3.0 ± 0.0                         | 100%      | 7.80 ± 1.92             |
| <i>Meiob</i> <sup>ΔS67/ΔS67</sup> | 8        | 3                        | 3              | 0                                 | 0%        | 0                       |

† Each female was housed with one wild type male for three months.

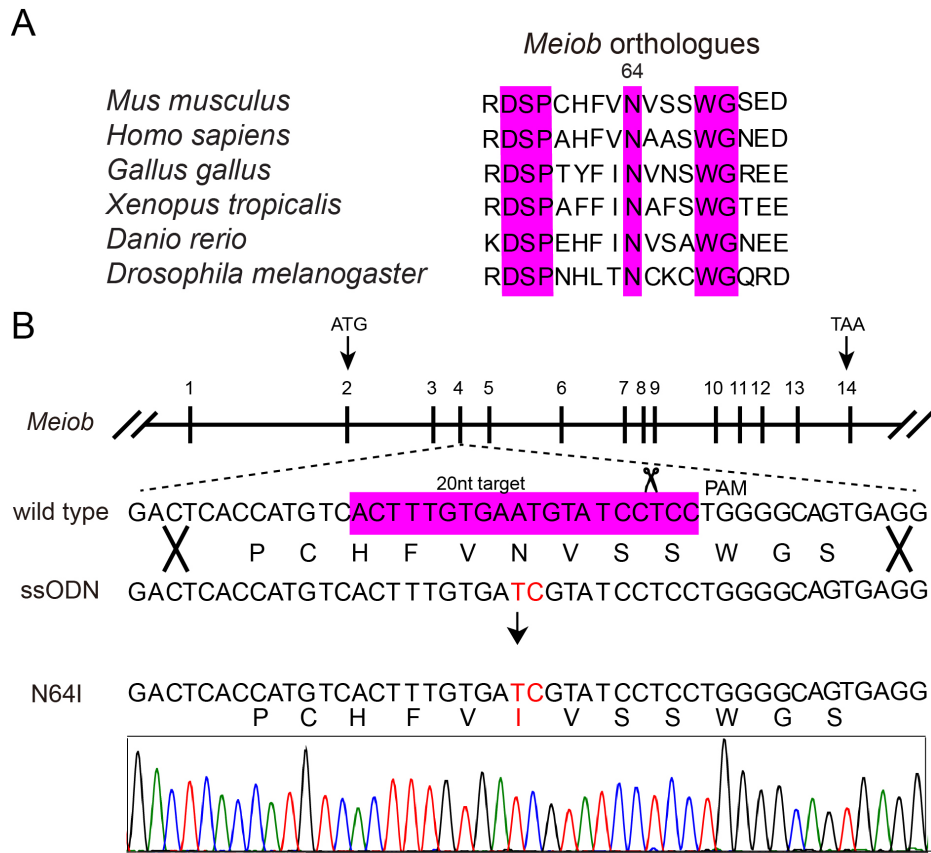

**Supplementary Figure S1.** CRISPR/Cas9-mediated generation of the *Meiob*<sup>N64I</sup> mutation. **(A)** Conservation of asparagine 64 (N64) in MEIOB across species. **(B)** Diagram of *Meiob* alleles (wild type and N64I), sgRNA (in red), and single-stranded donor oligonucleotide DNA template (ssODN). The *Meiob*<sup>N64I</sup> mutation was confirmed by sequencing.

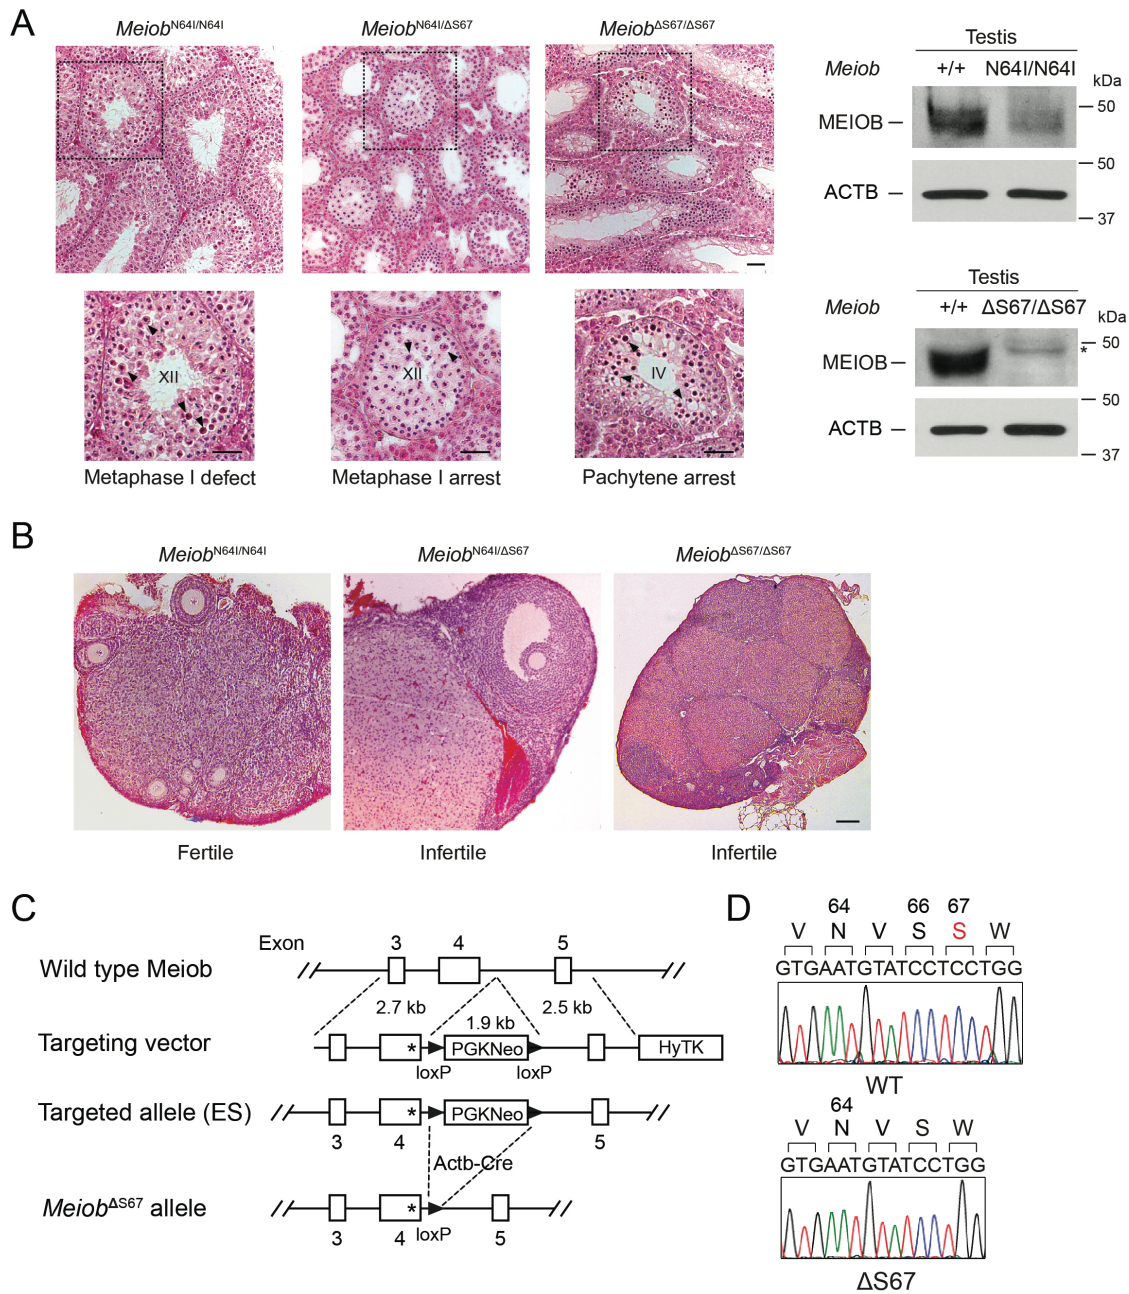

**Supplementary Figure S2.** Generation of the *MeioB*<sup>ΔS67</sup> mutation through CRISPR/Cas9 and gene targeting in ES cells. **(A)** Histology of testes from 8-week-old founder mice generated through CRISPR/Cas9 injection of zygotes. Western blot analysis of MEIOB in testes is shown on the right. ACTB serves as a loading control. Scale bars, 50  $\mu$ m. **(B)** Histology of ovaries from 8-week-old founder mice generated through CRISPR/Cas9 injection of zygotes. While the ovaries from *MeioB*<sup>N64I/N64I</sup> and *MeioB*<sup>N64I/ΔS67</sup> founder females contained follicles, the ovary from *MeioB*<sup>N64I/ΔS67</sup> founder females lacked oocytes. Scale bar, 50  $\mu$ m. **(C)** Generation of the *MeioB*<sup>ΔS67</sup> mutation through gene targeting in ES cells. Diagram of *MeioB* alleles. Codon 67 (Serine 67) lies in exon 4. Asterisk denotes the deletion of S67 ( $\Delta$ S67). The neomycin selection marker PGKNeo is flanked by *loxP* sites. HyTK provides negative selection in ES cells by ganciclovir. **(D)** Sequencing confirmed the deletion of codon 67 in *MeioB*. The codons for S66 and S67 are identical (TCC). Because the S67 residue is more evolutionarily conserved than S66 (Supplementary Figure S1A), this deletion is referred to as  $\Delta$ S67. Alternatively, this deletion can be called  $\Delta$ S66.

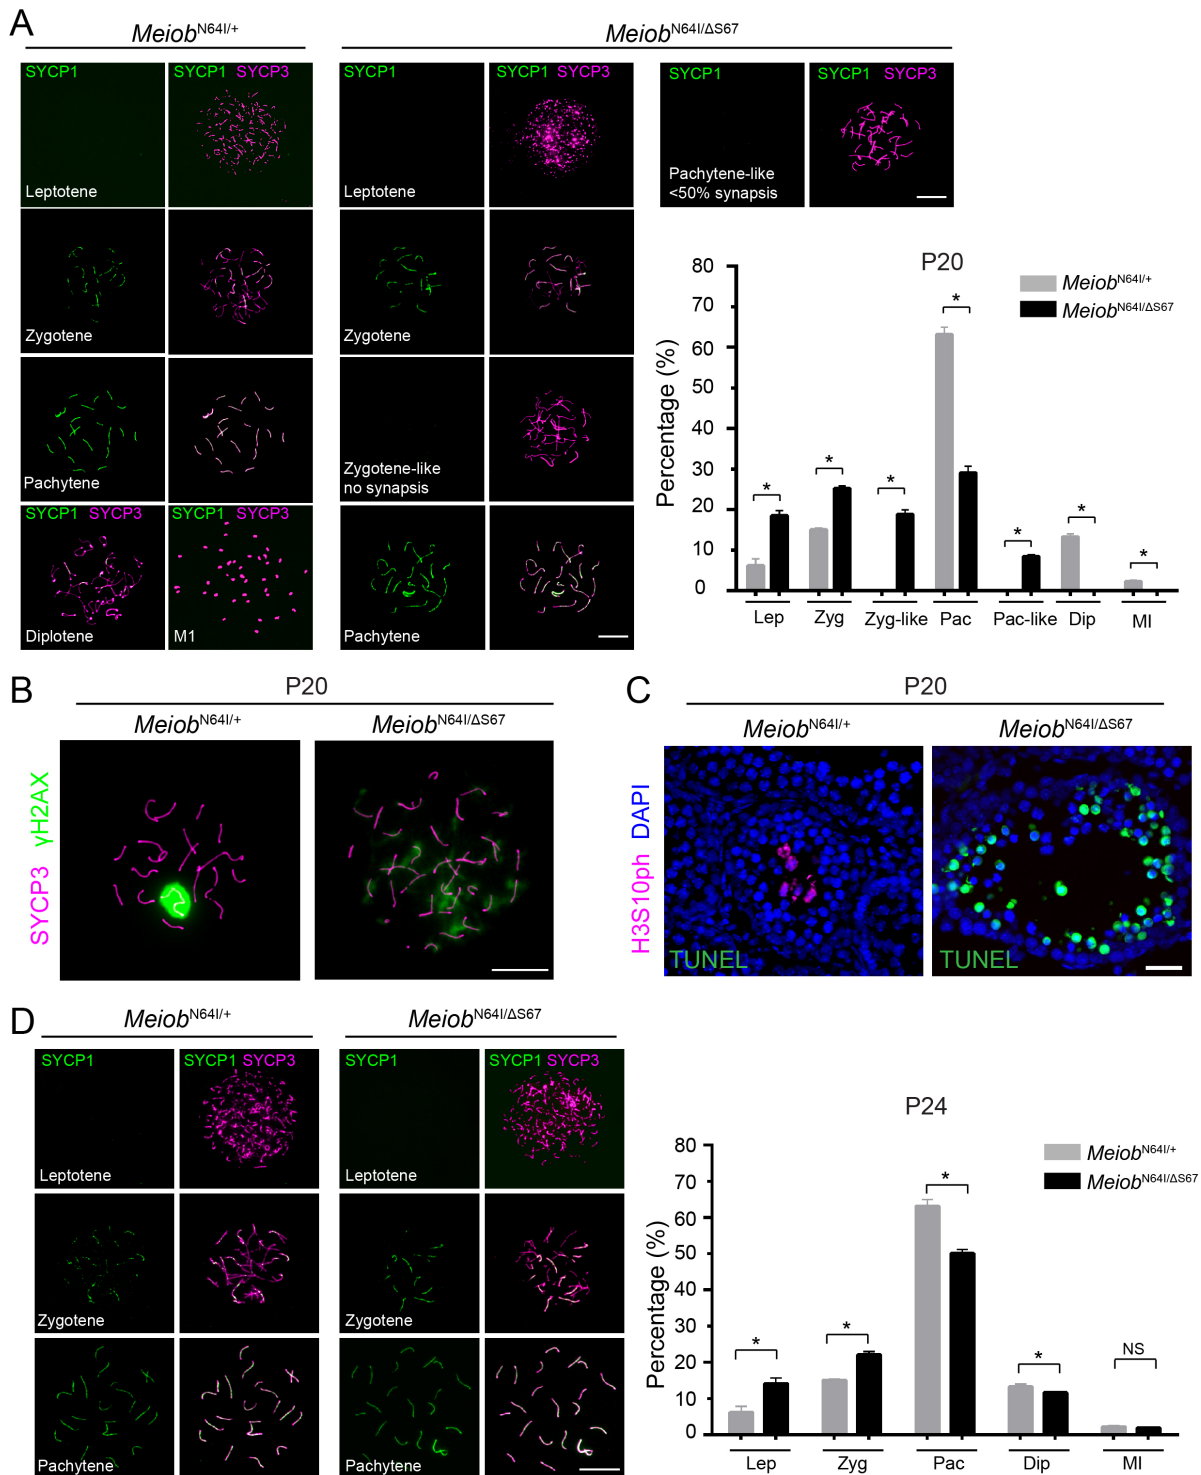

**Supplementary Figure S3.** The *Meiob*<sup>N64I/ΔS67</sup> mice display defects in synapsis at P20 but not at P24. (A) Spread nuclei of spermatocytes from P20 *Meiob*<sup>N64I/+</sup> and *Meiob*<sup>N64I/ΔS67</sup> males were immunostained with anti-SYCP1 and anti-SYCP3 antibodies. The graph shows the percentage of spermatocytes at each stage of meiotic prophase I. 181 *Meiob*<sup>N64I/+</sup> and 155 *Meiob*<sup>N64I/ΔS67</sup> spermatocytes from three mice per genotype were counted. Data are presented as mean ± S.D., \**P* < 0.05 by Student's *t*-test. Scale bar, 10 μm. (B) Distribution of γH2AX in *Meiob*<sup>N64I/+</sup> and *Meiob*<sup>N64I/ΔS67</sup> spermatocytes at P20. γH2AX was present in the chromatin of *Meiob*<sup>N64I/ΔS67</sup> pachytene-like

spermatocytes. Scale bar, 10  $\mu\text{m}$ . **(C)** TUNEL analysis of *Meiob*<sup>N64I/+</sup> and *Meiob*<sup>N64I/ $\Delta$ S67</sup> testes at P20. Scale bar, 20  $\mu\text{m}$ . **(D)** Spread nuclei of spermatocytes from P24 *Meiob*<sup>N64I/+</sup> and *Meiob*<sup>N64I/ $\Delta$ S67</sup> males were immunostained with anti-SYCP1 and anti-SYCP3 antibodies. The graph shows the percentage of each type of spermatocytes. 212 *Meiob*<sup>N64I/+</sup> and 180 *Meiob*<sup>N64I/ $\Delta$ S67</sup> spermatocytes from three mice per genotype were counted. Data are presented as mean  $\pm$  S.D., \* $P < 0.05$  by Student's *t*-test. NS, non-significant. Lep, leptotene; Zyg, zygotene; Zyg-like, zygotene-like; Pac, pachytene; Pac-like, pachytene-like; Dip, diplotene; MI, metaphase I. Scale bar, 10  $\mu\text{m}$ .

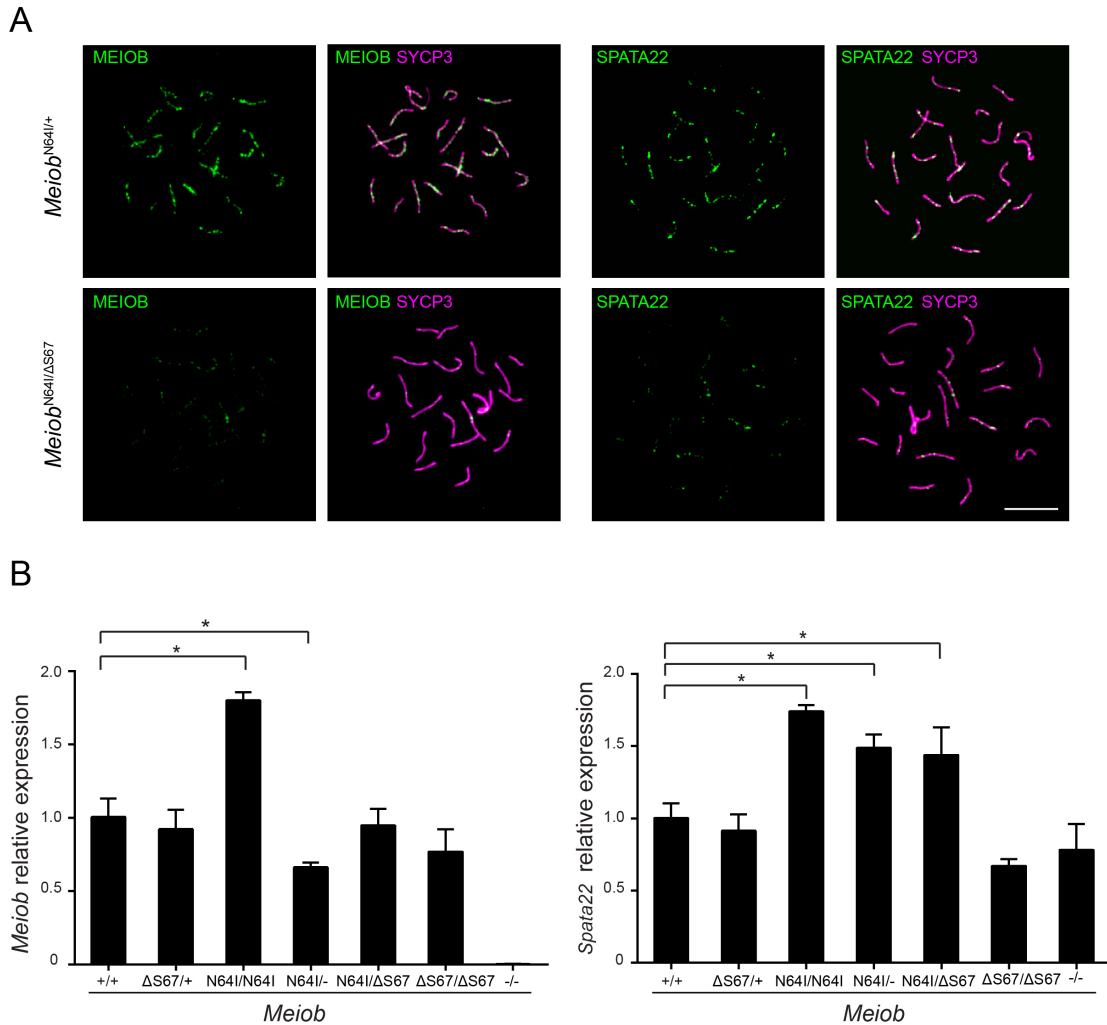

**Supplementary Figure S4.** Analysis of protein foci and transcript abundance of *MeioB* and *Spata22* in testes at P20. **(A)** Detection of MEIOB and SPATA22 foci on meiotic chromosomes at P20. The intensity of MEIOB and SPATA22 foci is weaker in *MeioB*<sup>N64I/ΔS67</sup> spermatocytes than in *MeioB*<sup>N64I/+</sup> spermatocytes. Scale bar, 10 μm. **(B)** Real-time PCR quantitation of *MeioB* and *Spata22* transcripts in P20 testes (three mice per genotype were used). Related to Figure 4G. Data are presented as mean ± S.D., \**P* < 0.05 by Student's *t*-test.



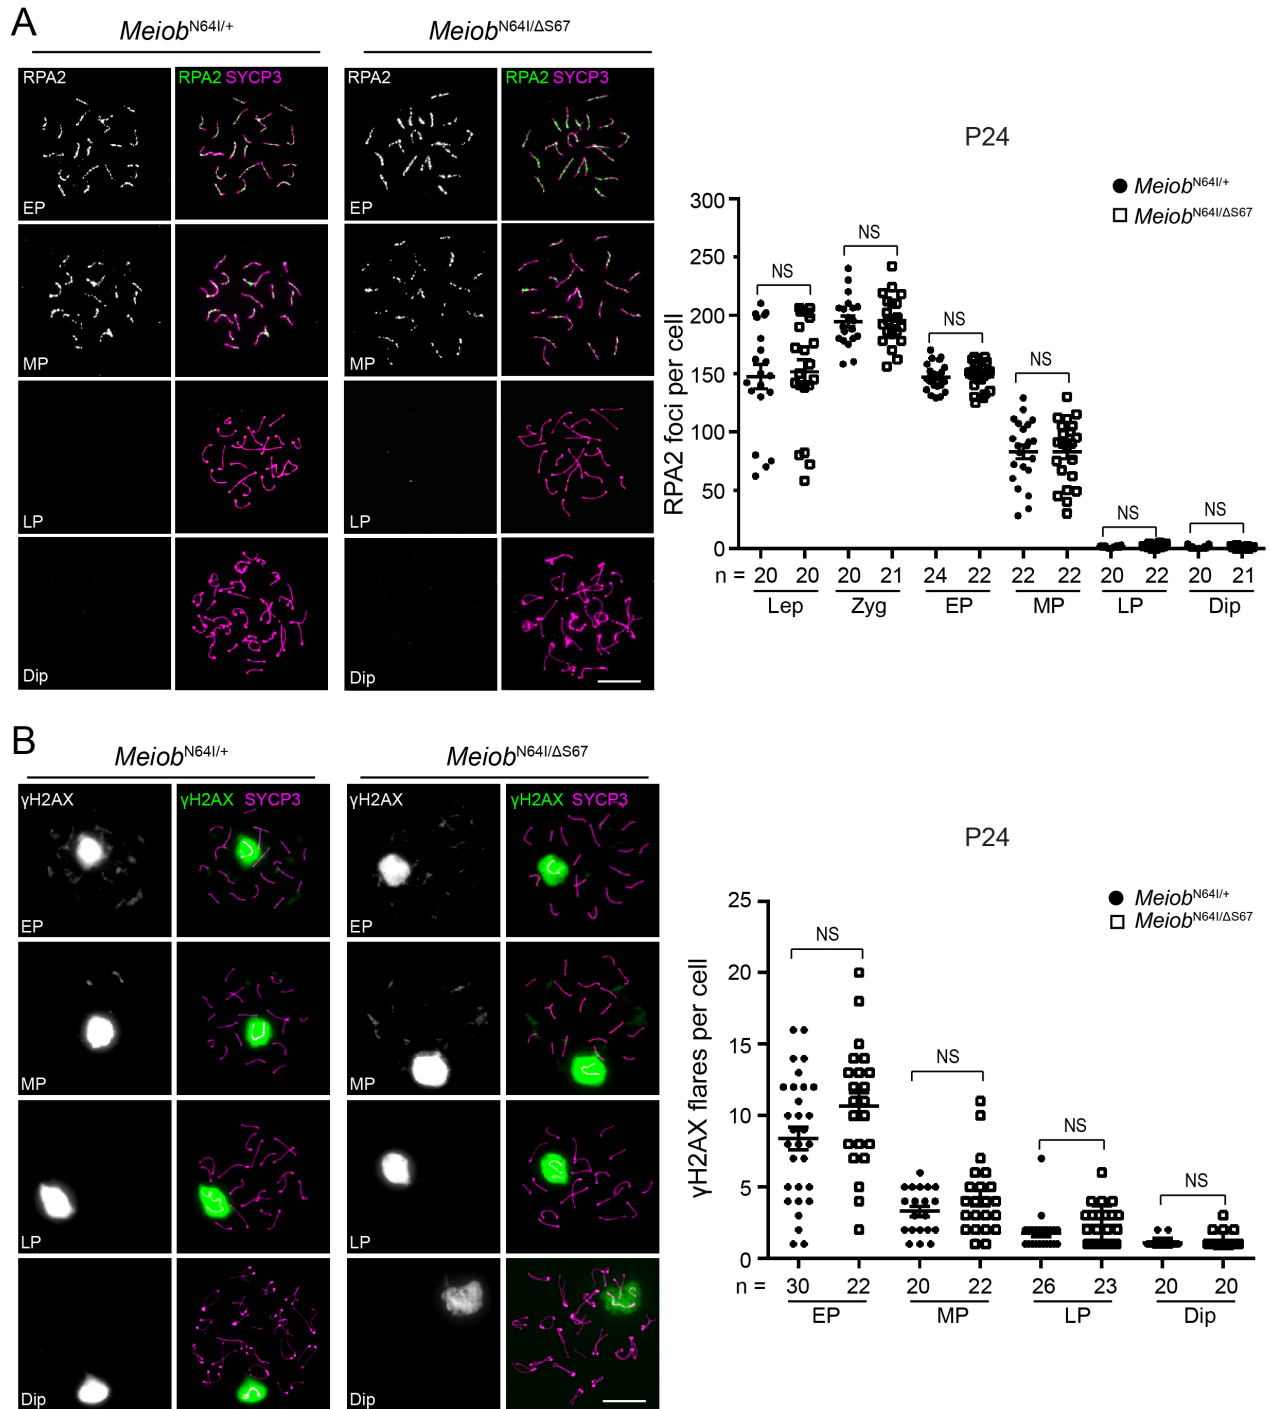

**Supplementary Figure S5.** Analysis of RPA2 and  $\gamma$ H2AX in P24 *Meiob*<sup>N64I/+</sup> and *Meiob*<sup>N64I/ΔS67</sup> spermatocytes. **(A)** Analysis of RPA2 foci in P24 spermatocytes. n, number of spermatocytes. Leptotene (Lep), Zygotene (Zyg), Early-pachytene (EP), Mid-pachytene (MP), late-pachytene (LP), Dip (Diplotene). **(B)** Analysis of  $\gamma$ H2AX flares in P24 spermatocytes. The  $\gamma$ H2AX in the XY body was counted once. n, number of spermatocytes. Three mice per genotype were analyzed. \* $P < 0.05$  by Student's *t*-test. Early-pachytene (EP), Mid-pachytene (MP), late-pachytene (LP), Dip (Diplotene). Scale bars, 10  $\mu$ m.

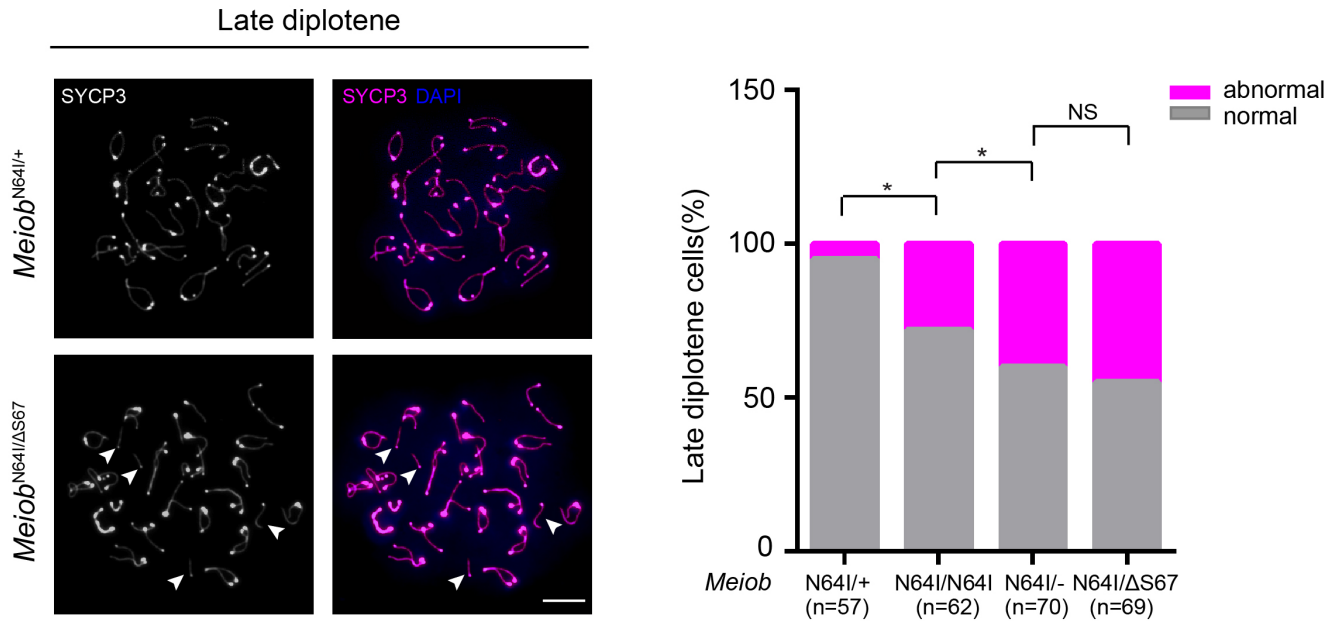

**Supplementary Figure S6.** Analysis of univalent chromosomes in late diplotene spermatocytes. Spermatocytes from P24 *MeioB*<sup>N64I/+</sup>, *MeioB*<sup>N64I/N64I</sup>, *MeioB*<sup>N64I/-</sup> and *MeioB*<sup>N64I/ΔS67</sup> mice were immunostained with anti-SYCP3. Univalents are indicated by arrowheads. Normal spermatocytes, all bivalents; abnormal spermatocytes, the presence of at least two univalents. n, number of diplotene spermatocytes counted. Four mice per genotype were analyzed. \**P* < 0.05 by Student's *t*-test. NS, non-significant. Scale bar, 10 μm.

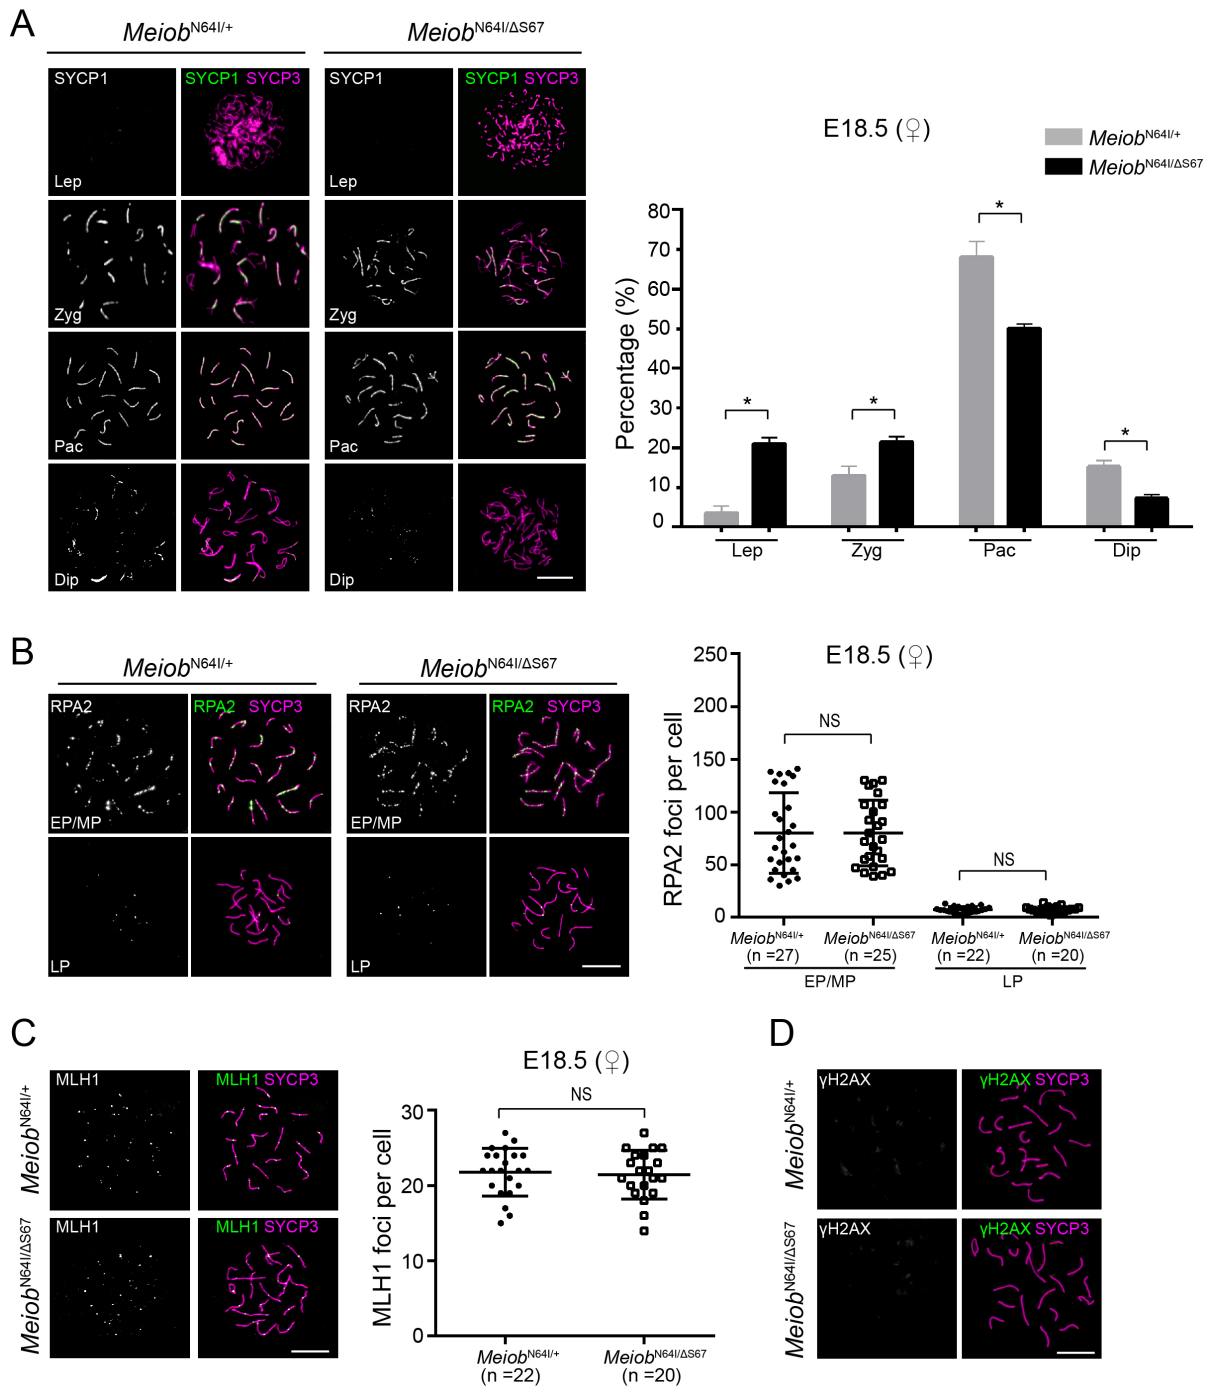

**Supplementary Figure S7.** *Meiob*<sup>N64I/ΔS67</sup> females exhibit normal synapsis and crossover formation at prophase I. **(A)** Spread nuclei of oocytes from embryonic day 18.5 (E18.5) *Meiob*<sup>N64I/+</sup> and *Meiob*<sup>N64I/ΔS67</sup> ovaries were immunostained with anti-SYCP1 and anti-SYCP3 antibodies. The graph shows the percentage of prophase I substages. 180 *Meiob*<sup>N64I/+</sup> and 150 *Meiob*<sup>N64I/ΔS67</sup> oocytes from three embryos per genotype were counted. Lep, leptotene; Zyg, zygotene; Pac, pachytene; Dip, diplotene. Data are presented as mean ± S.D., \**P* < 0.05 by Student's *t*-test. **(B)** Analysis of RPA2 foci in E18.5 oocytes. n, number of oocytes. Early-pachytene (EP), Mid-pachytene (MP), late-pachytene (LP). **(C)** Analysis of MLH1 foci in *Meiob*<sup>N64I/+</sup> and *Meiob*<sup>N64I/ΔS67</sup> pachytene oocytes at E18.5. n, number of mid to late pachytene oocytes counted. Three embryos per genotype were analyzed. **(D)**

Lack of  $\gamma$ H2AX in *Meiob*<sup>N64I/+</sup> and *Meiob*<sup>N64I/ $\Delta$ S67</sup> pachytene oocytes at E18.5. NS, non-significant. Scale bars, 10  $\mu$ m.

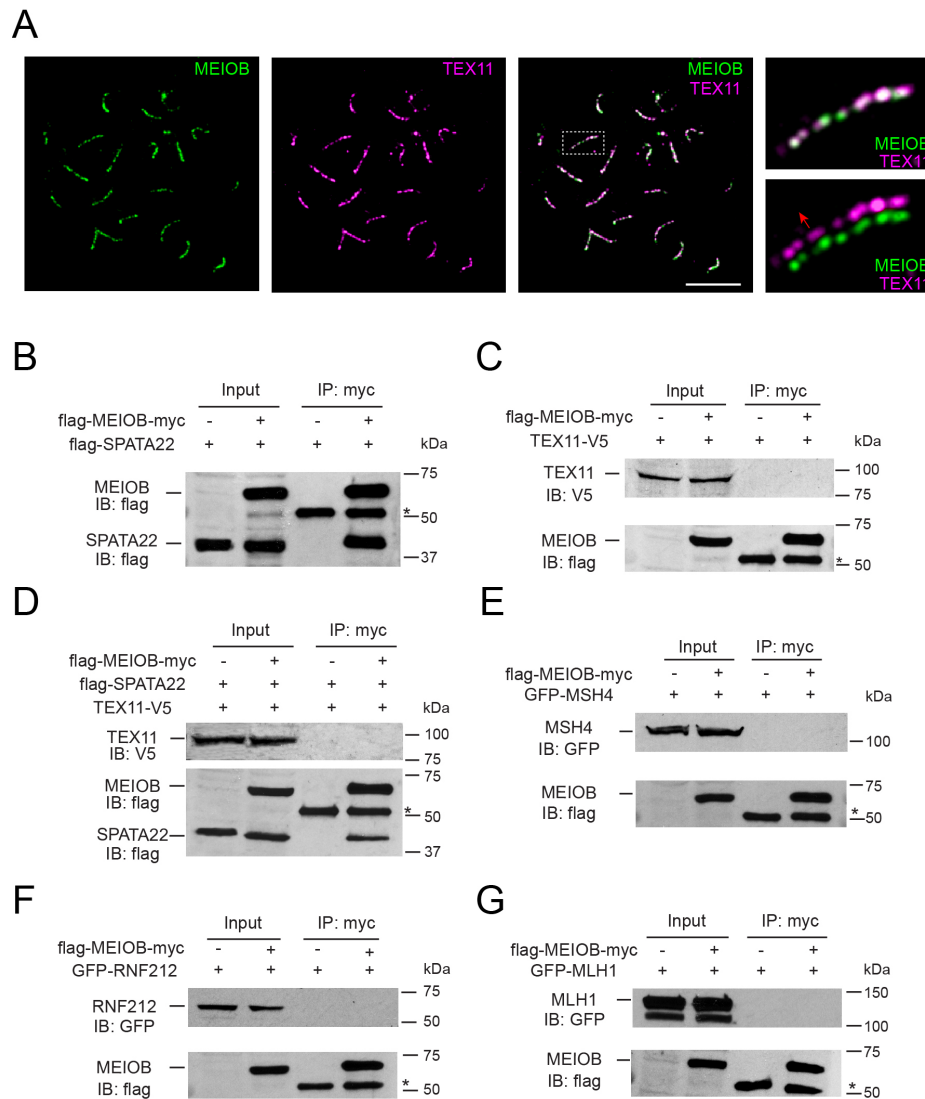

**Supplementary Figure S8.** Colocalization of MEIOB with TEX11 in pachytene spermatocytes and *in vitro* co-immunoprecipitation (co-IP) analyses. (A) Double immunostaining of spermatocytes from P20 testes was performed with guinea pig anti-MEIOB and rabbit anti-TEX11 antibodies. Enlarged views of the chromosome marked by a box (without or with offset channels) were shown. The red arrow indicates the offset direction of the red channel (TEX11). (B-G) HEK293T cells were transfected with the indicated expression vectors. (B) Co-IP of MEIOB and SPATA22 serves as a positive control. (C, D) Co-IP analysis of MEIOB and TEX11 interaction in the absence (C) or presence (D) of SPATA22. (E-G) Co-IP analysis of MEIOB with MSH4 (E), RNF212 (F), and MLH1 (G). \*, antibody heavy chain.

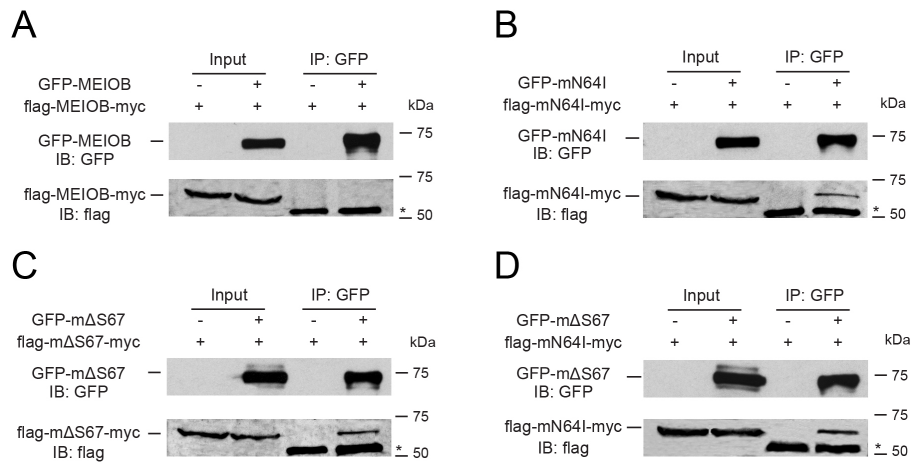

**Supplementary Figure S9.** *Meiob* mutations cause self-association: reciprocal immunoprecipitations with anti-GFP antibody for experiments in Figure 6. Full-length mouse MEIOB proteins were expressed in HEK293T cells in all transfection experiments. **(A)** Wild type MEIOB does not self-associate: reciprocal co-IP of Figure 6E. **(B)** MEIOB<sup>N64I</sup> interacts with itself: reciprocal co-IP of Figure 6G. **(C)** MEIOB<sup>ΔS67</sup> interacts with itself: reciprocal co-IP of Figure 6H. **(D)** MEIOB<sup>N64I</sup> interacts with MEIOB<sup>ΔS67</sup> : reciprocal co-IP of Figure 6I.

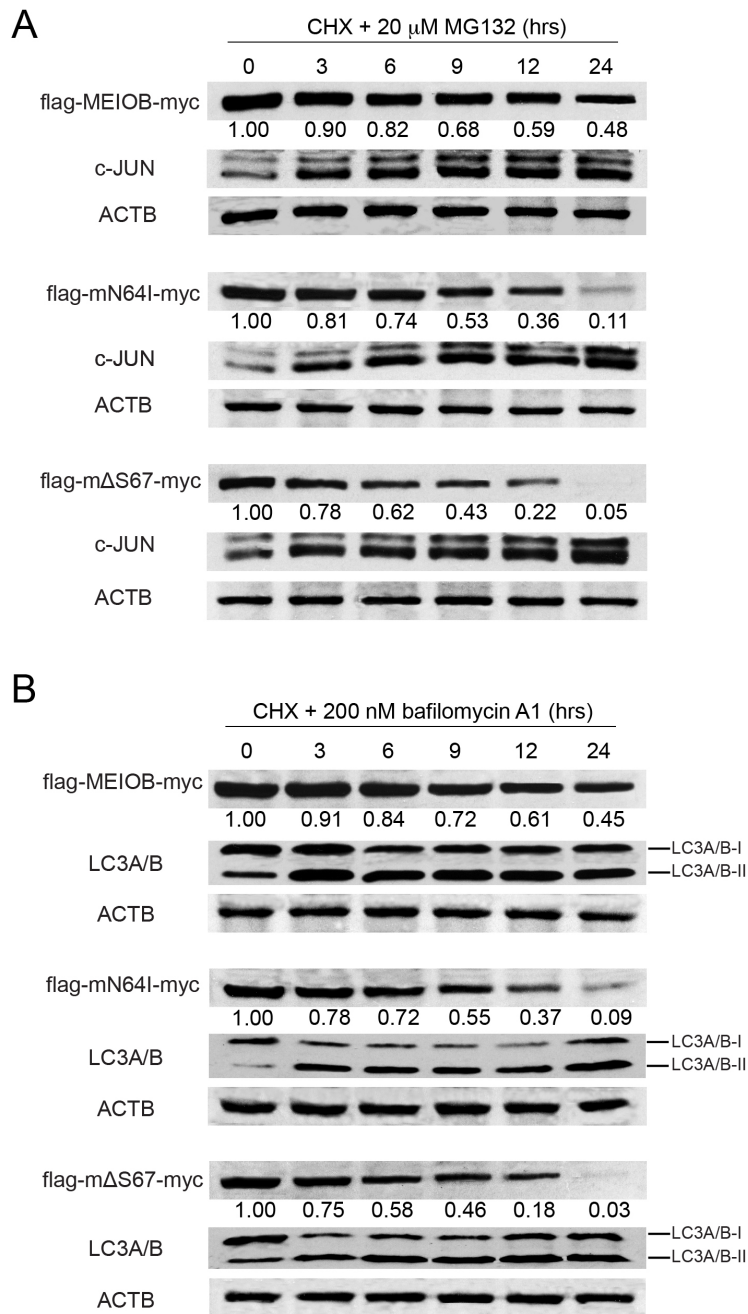

**Supplementary Figure S10.** MEIOB is not degraded through the proteasome or the autophagosome. **(A)** Western blot analysis of mouse MEIOB (wt), MEIOB<sup>N64I</sup>, and MEIOB <sup>$\Delta$ S67</sup> in HEK293T cells treated with cycloheximide and MG132. c-Jun serves as a positive control for MG132 treatment. ACTB serves as a loading control. **(B)** Western blot analysis of mouse MEIOB (wt), MEIOB<sup>N64I</sup>, and MEIOB <sup>$\Delta$ S67</sup> in HEK293T cells treated with cycloheximide and bafilomycin A1. LC3A/B-II, an autophagosome marker serves as a positive control for bafilomycin A1 treatment. ACTB serves as a loading control. The number below each band is the fold change of protein abundance compared to the time zero. The experiments were performed twice with similar results.
